# Supplementary material for: Crystal structures of the human neurokinin 1 receptor in complex with clinically used antagonists
Source: PubMed Central journal article supplement (PMC6318301; doi:10.1038/s41467-018-07939-8), 2019-01-03
Supplement: 41467_2018_7939_MOESM1_ESM.pdf [file 41467_2018_7939_MOESM1_ESM.pdf]

## **Supplementary Information**

### **Crystal structures of the human neurokinin 1 receptor in complex with clinically used antagonists**

J. Schöppe, J. Ehrenmann et al.

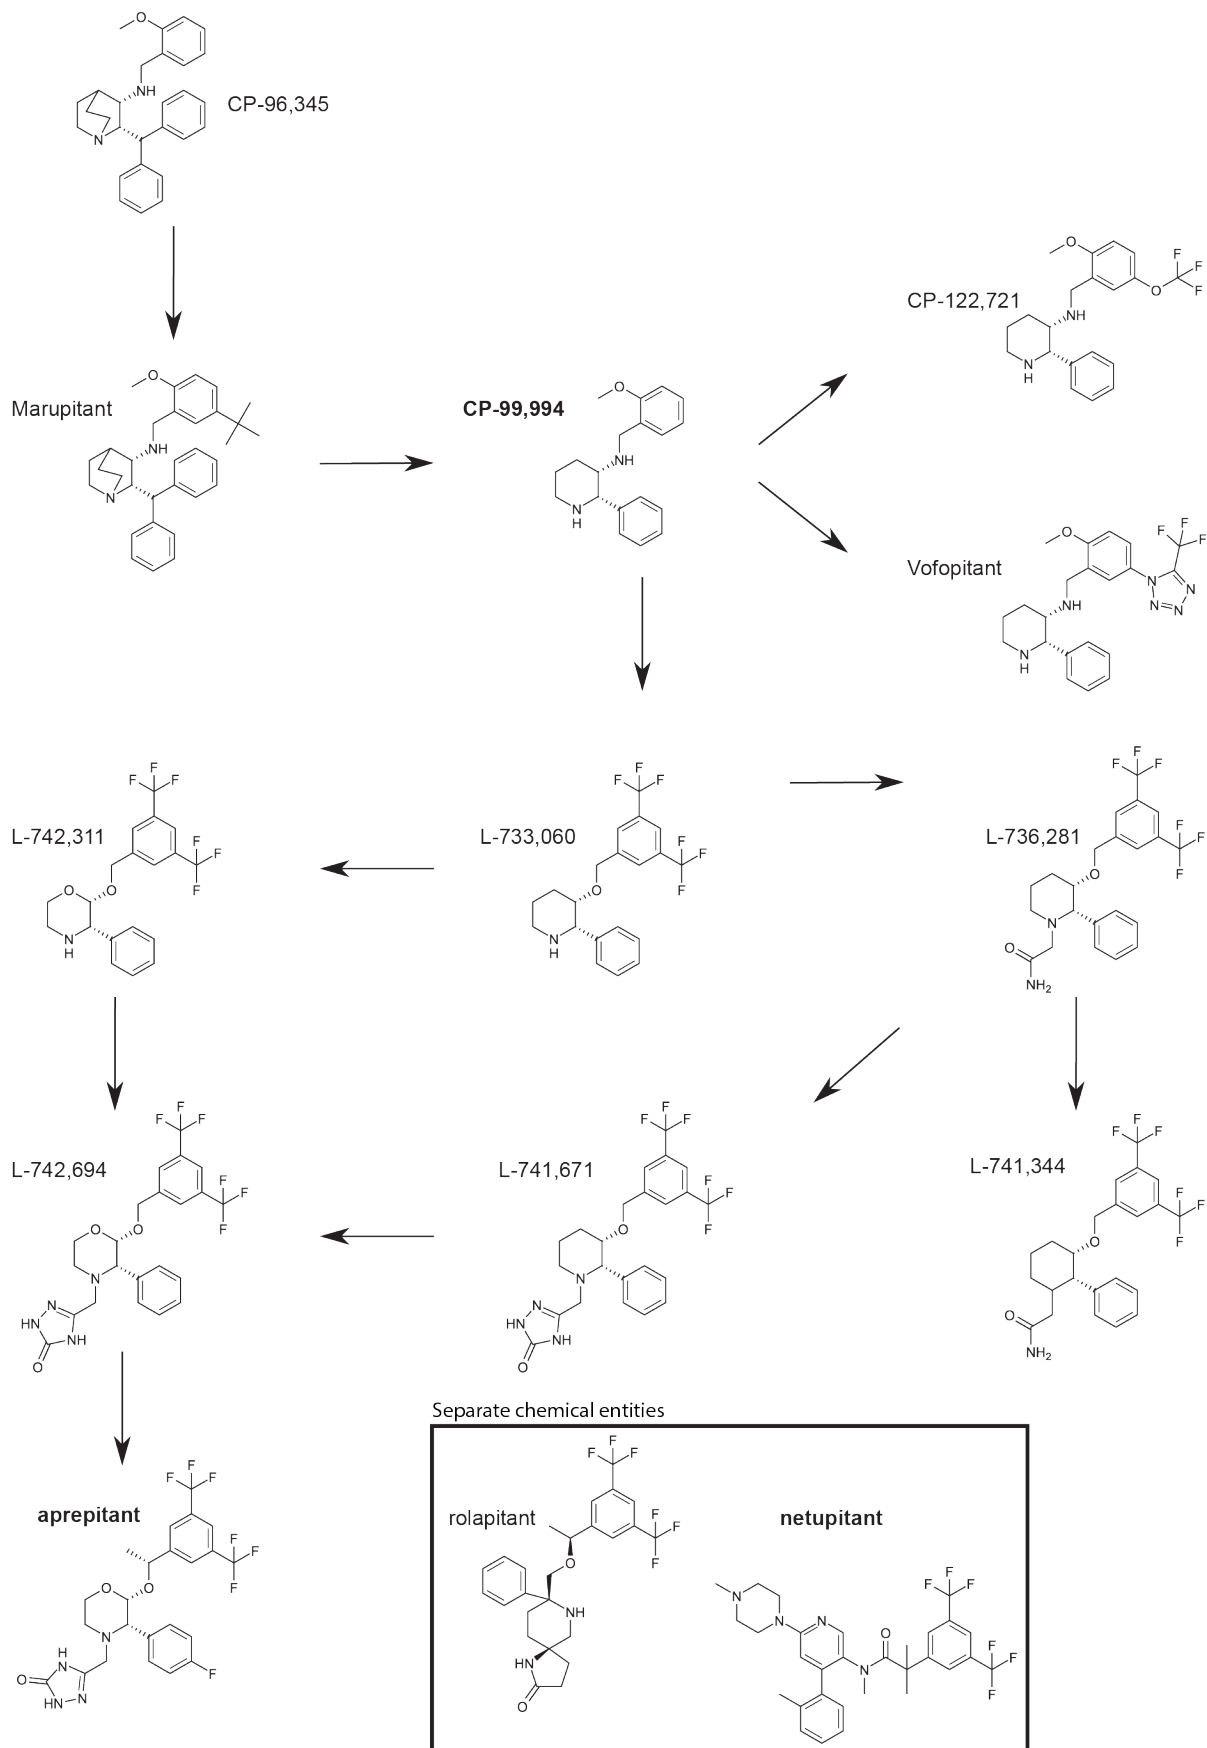

**Supplementary Figure 1. Overview of non-peptide NK<sub>1</sub>R antagonist development.**

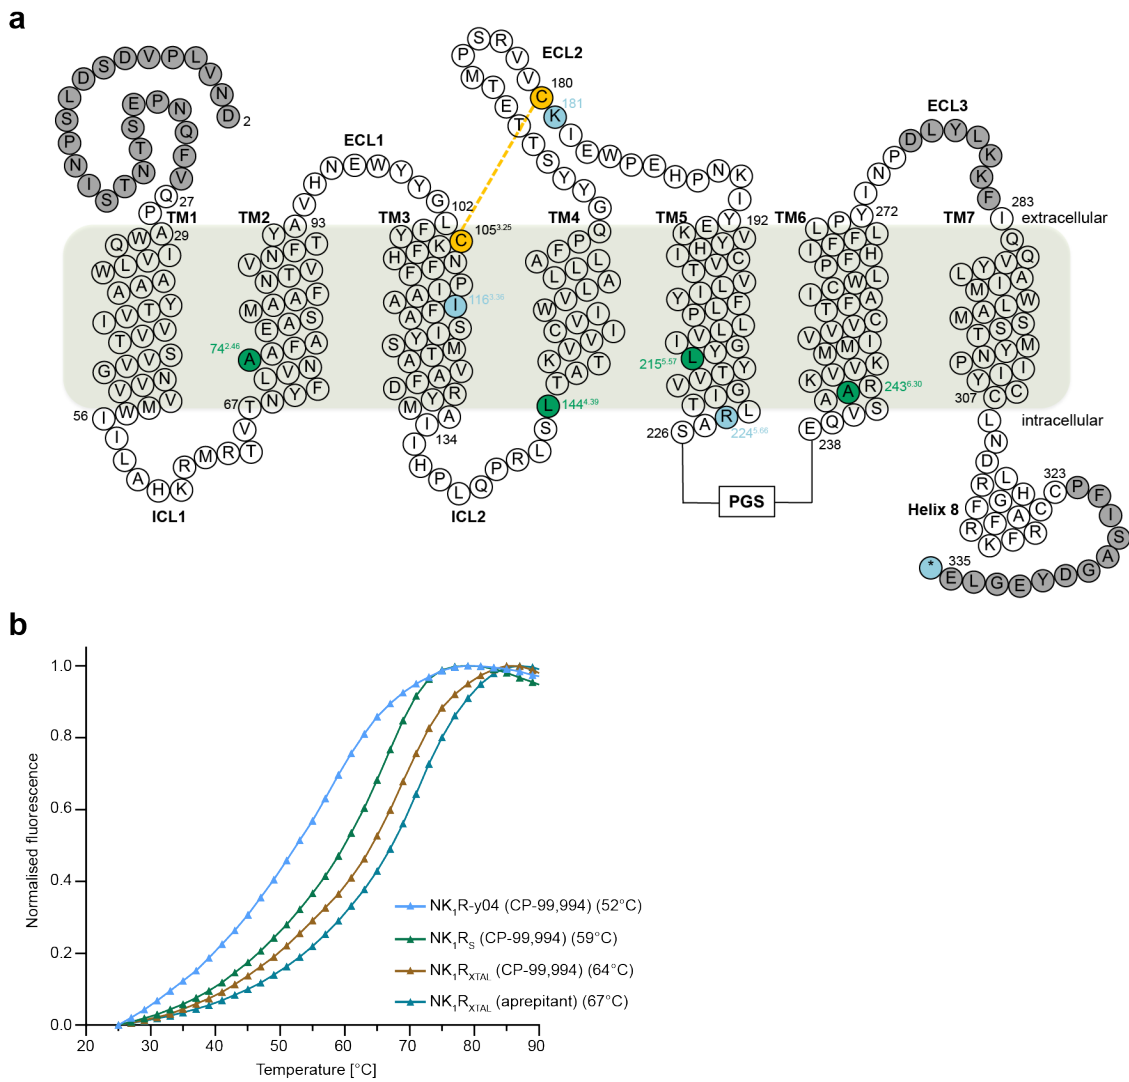

**Supplementary Figure 2. Overview of the crystallised NK<sub>1</sub>R construct and thermostability of NK<sub>1</sub>R mutants bound to CP-99,994 or aprepitant.** (a) Snake plot of the crystallised NK<sub>1</sub>R construct NK<sub>1</sub>R<sub>XTAL</sub>. Residues 336-407 at the receptor C-terminus were truncated and residues 227-237 of ICL3 were replaced by a PGS fusion. Mutations from directed evolution in *S. cerevisiae* and the additionally introduced thermostabilising mutations are highlighted in blue and green, respectively. The conserved disulfide bond is indicated by a dashed yellow line. The first and last residues of transmembrane helices I-VII (TM1-7) are labelled with the residue number. Residues which are not resolved in the crystal structure are shown in grey. (b) Thermostability assay (CPM) of the yeast-evolved NK<sub>1</sub>R (NK<sub>1</sub>R-y04) bound to CP-99,994, the further thermostabilised NK<sub>1</sub>R (NK<sub>1</sub>R<sub>S</sub>) bound to CP-99,994 and the crystallisation construct NK<sub>1</sub>R<sub>XTAL</sub> bound to CP-99,994 and aprepitant. The respective melting temperatures are indicated in parentheses.

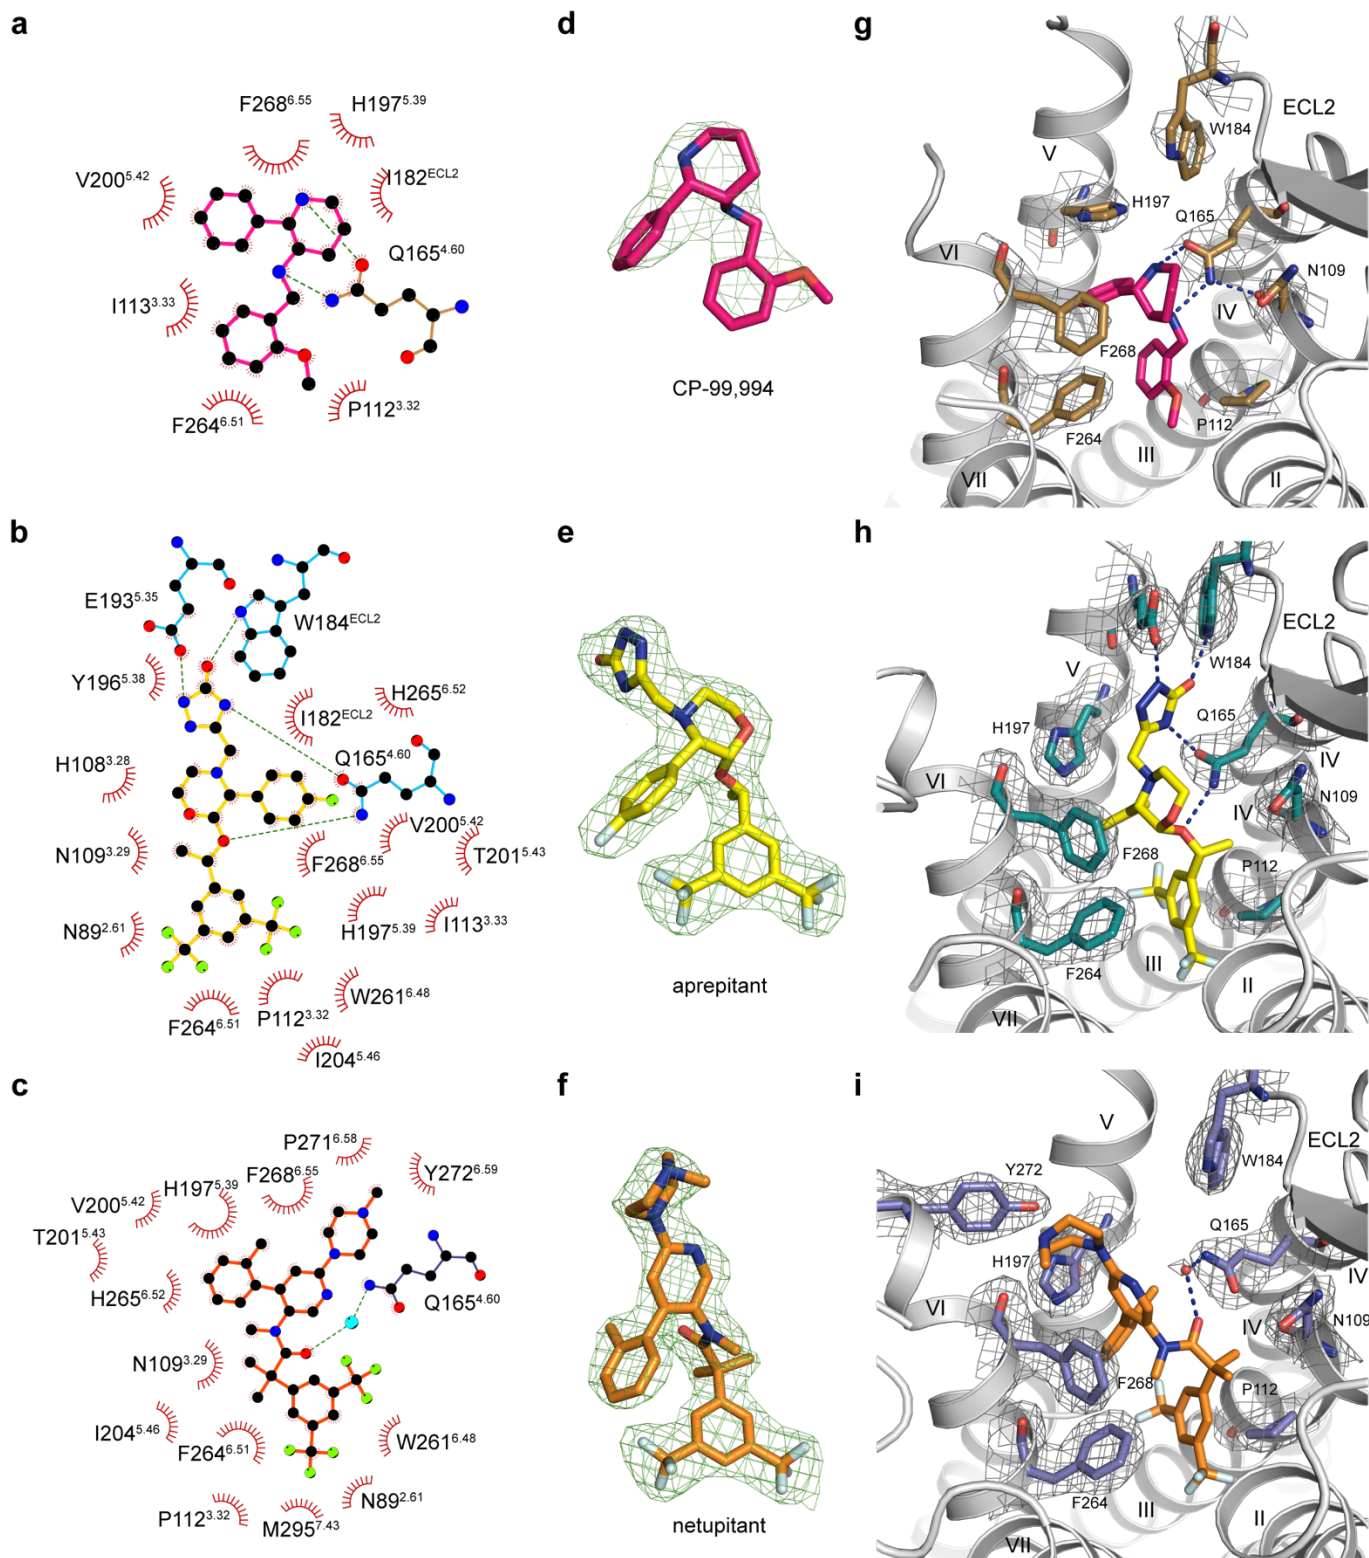

**Supplementary Figure 3. Co-crystallised NK<sub>1</sub>R antagonists and sidechain electron density within the orthosteric pocket.** (a-c) Schematic representation of interactions between NK<sub>1</sub>R and the antagonists CP-99,994 (a), aprepitant (b) and netupitant (c) analysed by LigPlot+ (Laskowski, R. A. *et al.* LigPlot+: multiple ligand–protein interaction diagrams for drug discovery. *J. Chem. Inf. Model.* **51**, 2778–2786 (2011)). The ordered water involved in netupitant binding is depicted as a light-blue sphere (c). Hydrogen bonds are indicated by dashed lines. (d-f) The co-crystallised antagonists CP-99,994 (d), aprepitant (e) and netupitant (f) are shown as sticks. Oxygen, nitrogen and fluorine atoms of the ligands are highlighted in red, blue and grey, respectively. 2F<sub>o</sub>-F<sub>c</sub> electron density maps of the ligands are shown in green mesh contoured at 1.0  $\sigma$ . (g-h) 2F<sub>o</sub>-F<sub>c</sub> electron density maps contoured at 1.0  $\sigma$  for the

sidechains of key interaction residues within the orthosteric pocket of NK<sub>1</sub>R structures solved in complex with CP-99,994 (**g**), aprepitant (**h**) and netupitant (**i**). Receptor and ligand representations are as in **Figure 2a-c**.

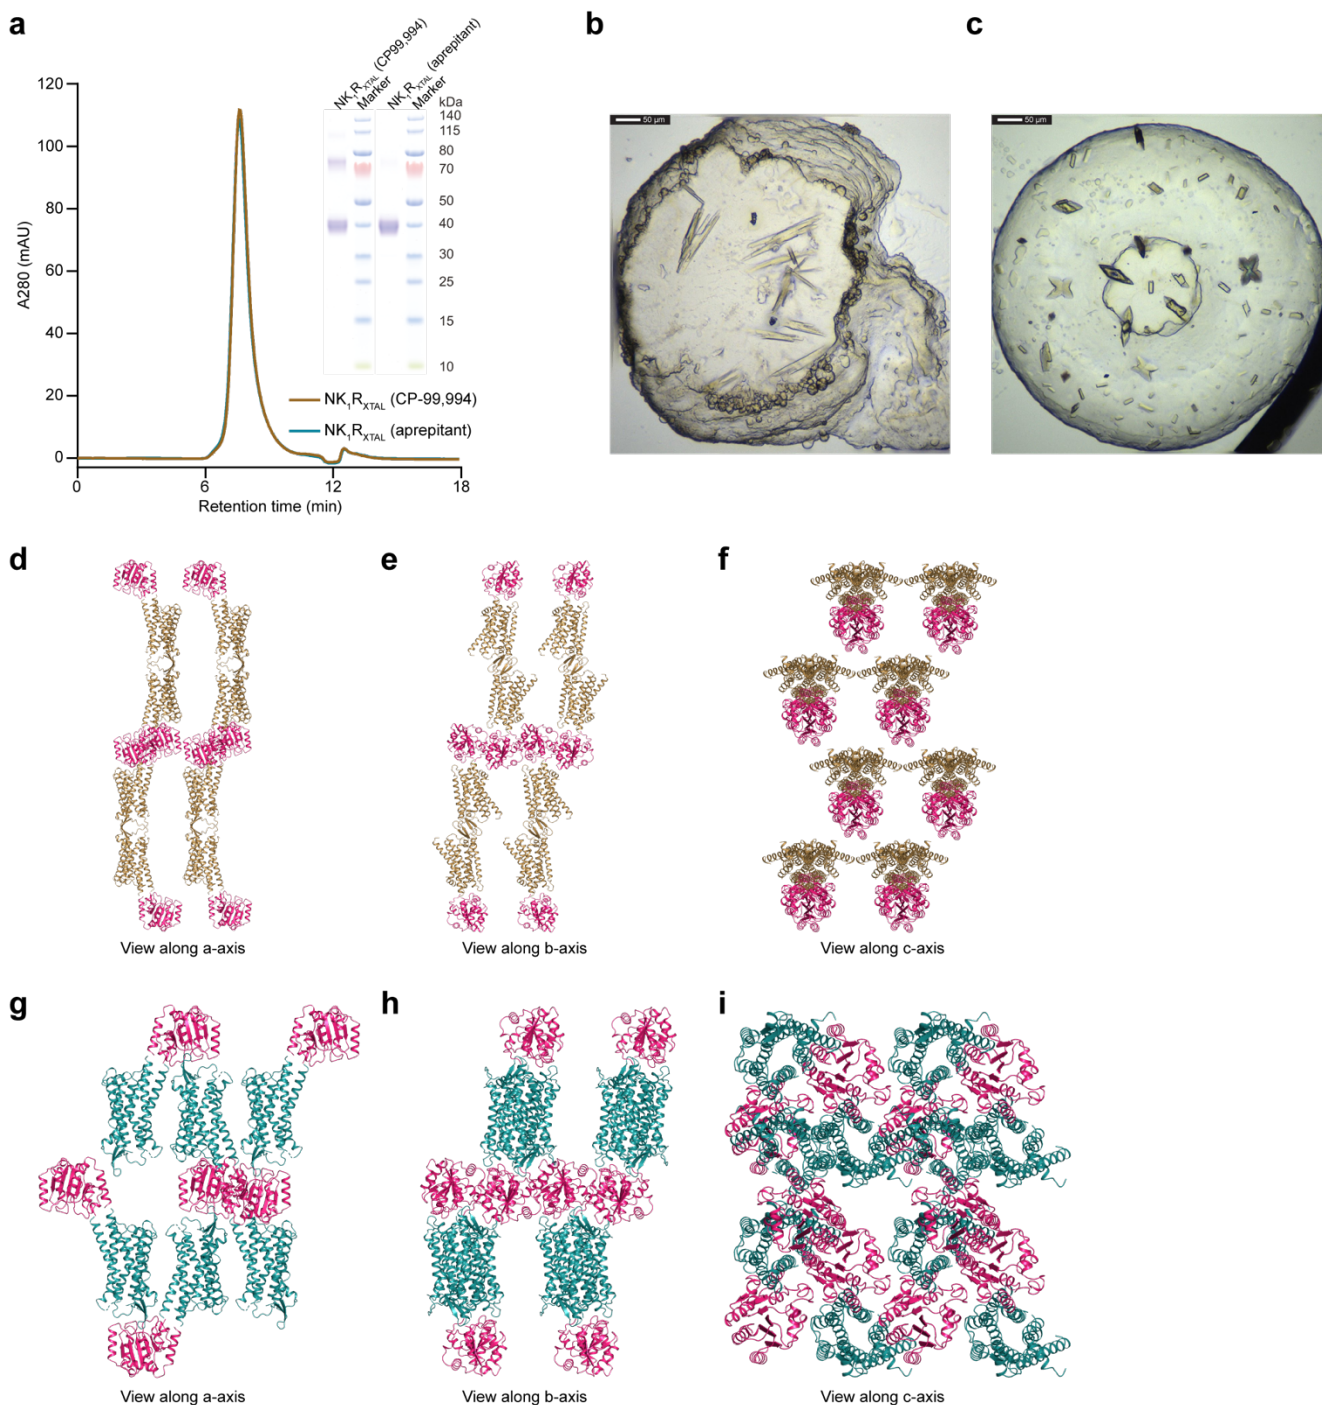

**Supplementary Figure 4. NK<sub>1</sub>R crystallisation.** (a) Size exclusion profiles and SDS-PAGE gels of purified NK<sub>1</sub>R<sub>XTAL</sub> in complex with CP-99,994 or aprepitant. (b) Bright-field image of NK<sub>1</sub>R<sub>XTAL</sub>:CP-99,994 complex crystals in lipidic cubic phase. (c) Bright-field image of NK<sub>1</sub>R<sub>XTAL</sub>:aprepitant complex crystals in lipidic cubic phase. (d-i) Packing of NK<sub>1</sub>R<sub>XTAL</sub> crystals as views along axes a, b and c of the unit cell (PGS fusion shown in pink). NK<sub>1</sub>R<sub>XTAL</sub>:CP-99,994 (coloured in brown) crystallised in space group C222<sub>1</sub> (d-f). NK<sub>1</sub>R<sub>XTAL</sub>:aprepitant (coloured in turquoise) crystallised in space group P2<sub>1</sub>2<sub>1</sub>2<sub>1</sub> (g-i).

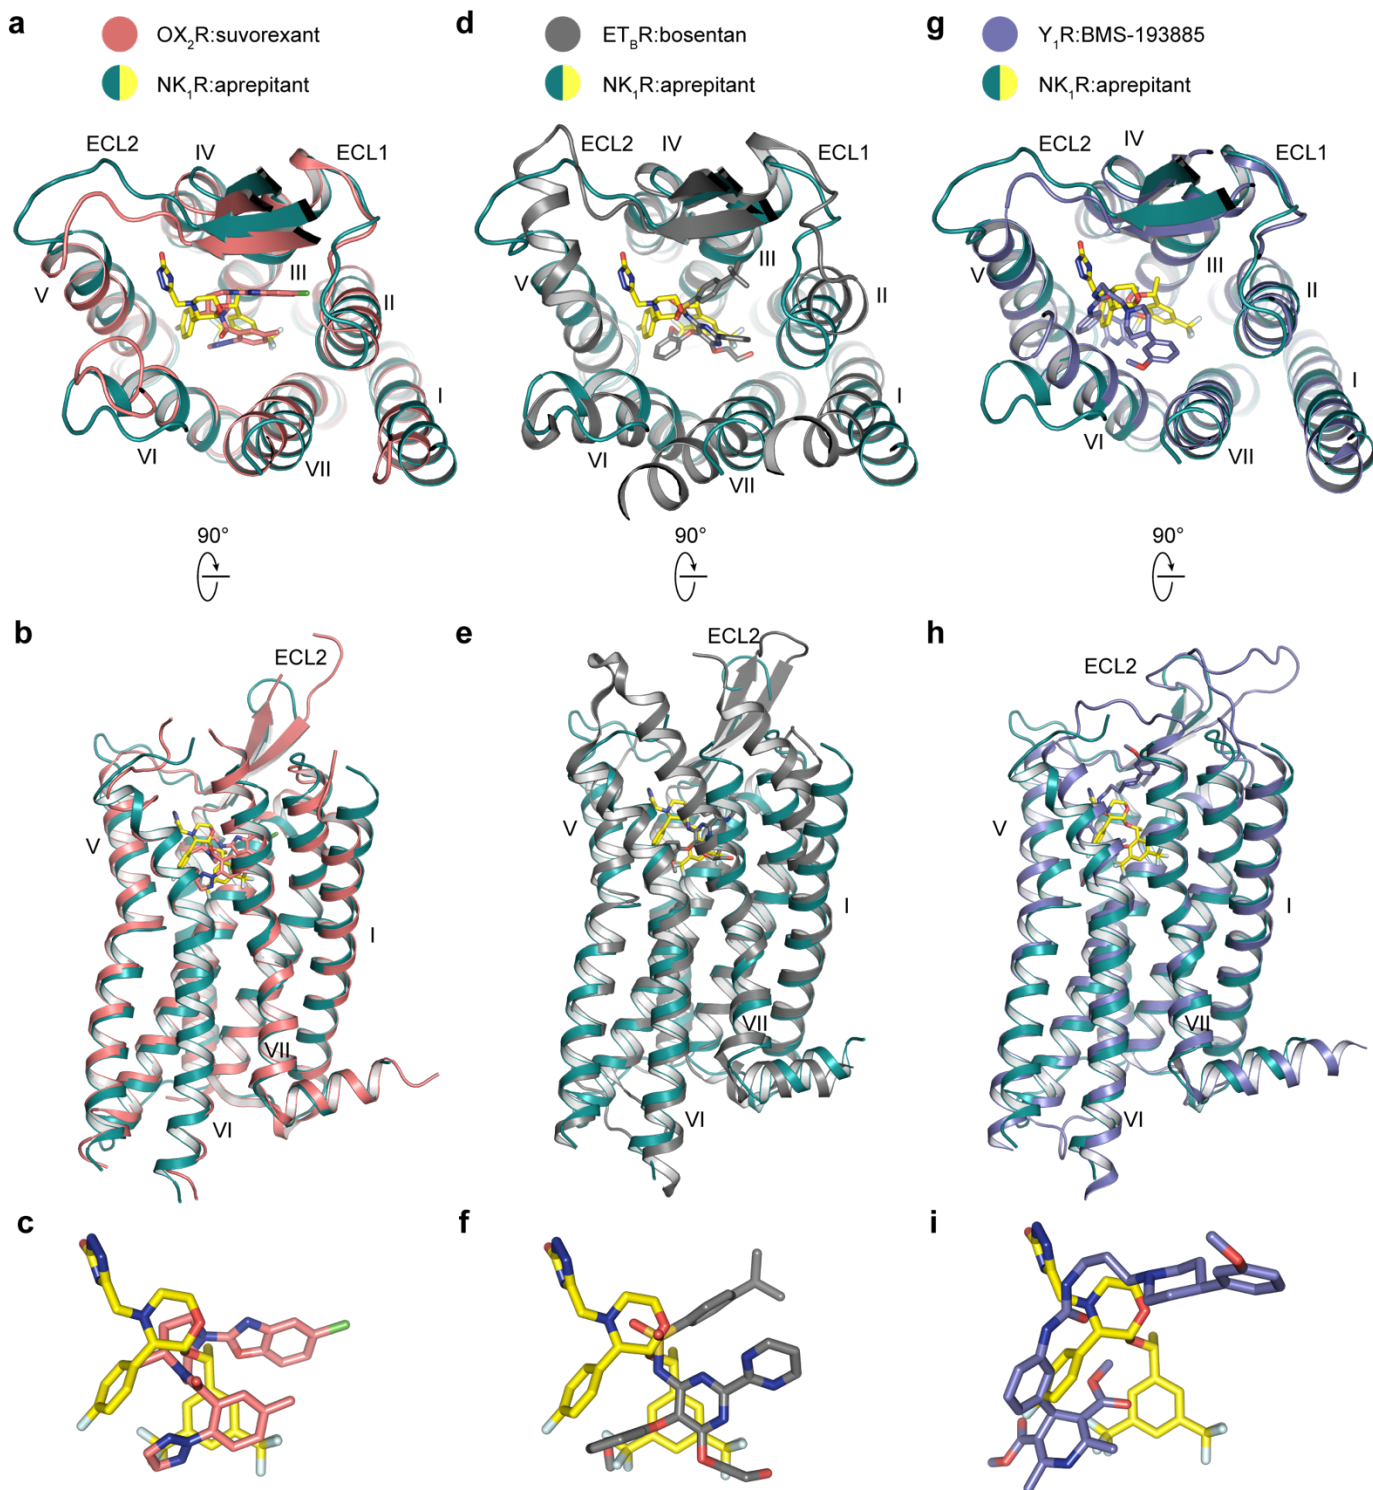

**Supplementary Figure 5. Comparison of antagonist binding mode of NK<sub>1</sub>R and other peptidergic GPCRs.** (a-c) Overlay of the structures of NK<sub>1</sub>R:aprepitant and OX<sub>2</sub>R:suvorexant (PDB ID 4S0V) as viewed from the extracellular space (a), from the membrane plane (b) and the isolated antagonists viewed from helix VI-VII (c). (d-f) Overlay of the structures of NK<sub>1</sub>R:aprepitant and ET<sub>B</sub>R:bosentan (PDB ID 5XPR) as viewed from extracellular space (d), from the membrane plane (e) and the isolated antagonists viewed from helix VI-VII (f). (g-i) Overlay of the structures of NK<sub>1</sub>R:aprepitant and Y<sub>1</sub>R:BMS-193885 (PDB ID 5ZBH) as viewed from extracellular space (g), from the membrane (h) and the isolated antagonists viewed from helix VI-VII (i).

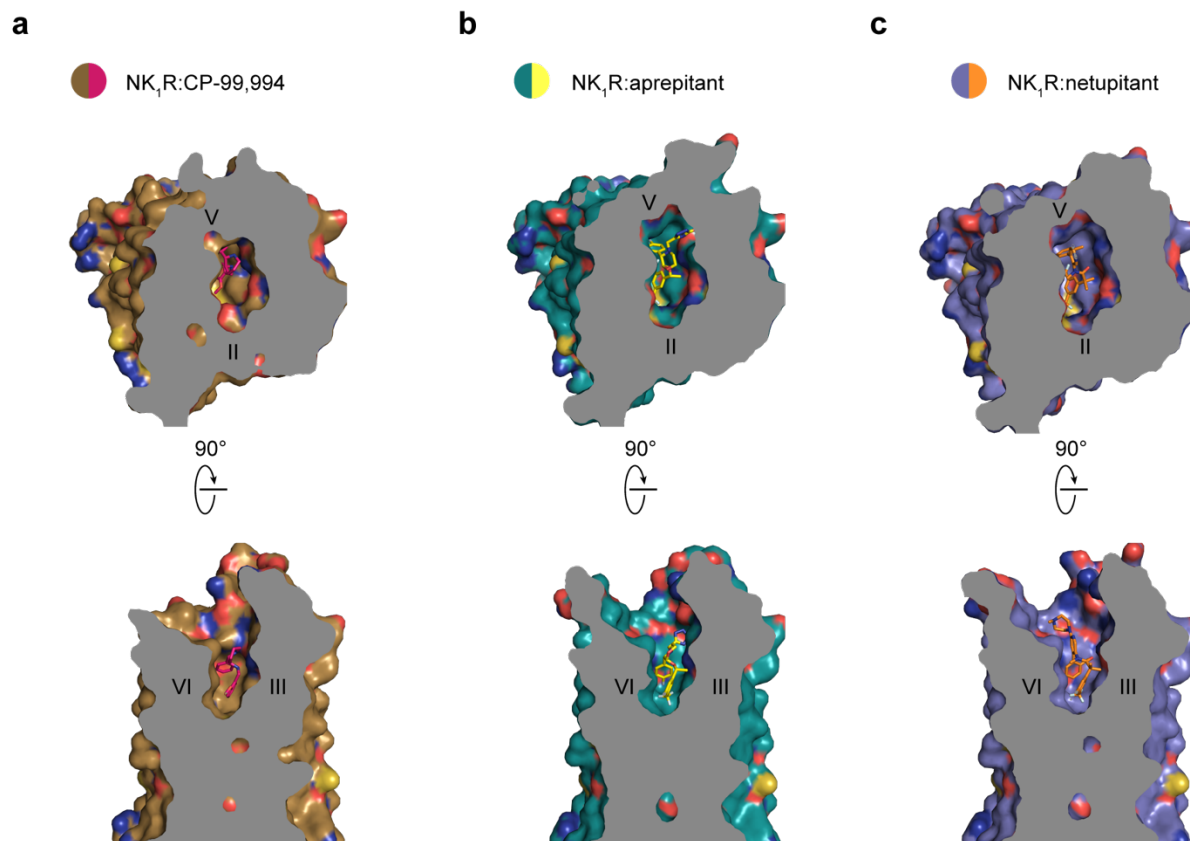

**Supplementary Figure 6. Orthosteric binding pocket of NK<sub>1</sub>R.** (a-c) Cutaway view on the orthosteric binding pocket of NK<sub>1</sub>R in complex with CP-99,994 (a), aprepitant (b) and netupitant (c) as viewed from the extracellular space (top) and parallel to the membrane plane from transmembrane helix II. The receptor:ligand complexes are coloured as in **Figure 1**. The position of transmembrane helices II and V (top) as well as III and VI (bottom) are indicated.



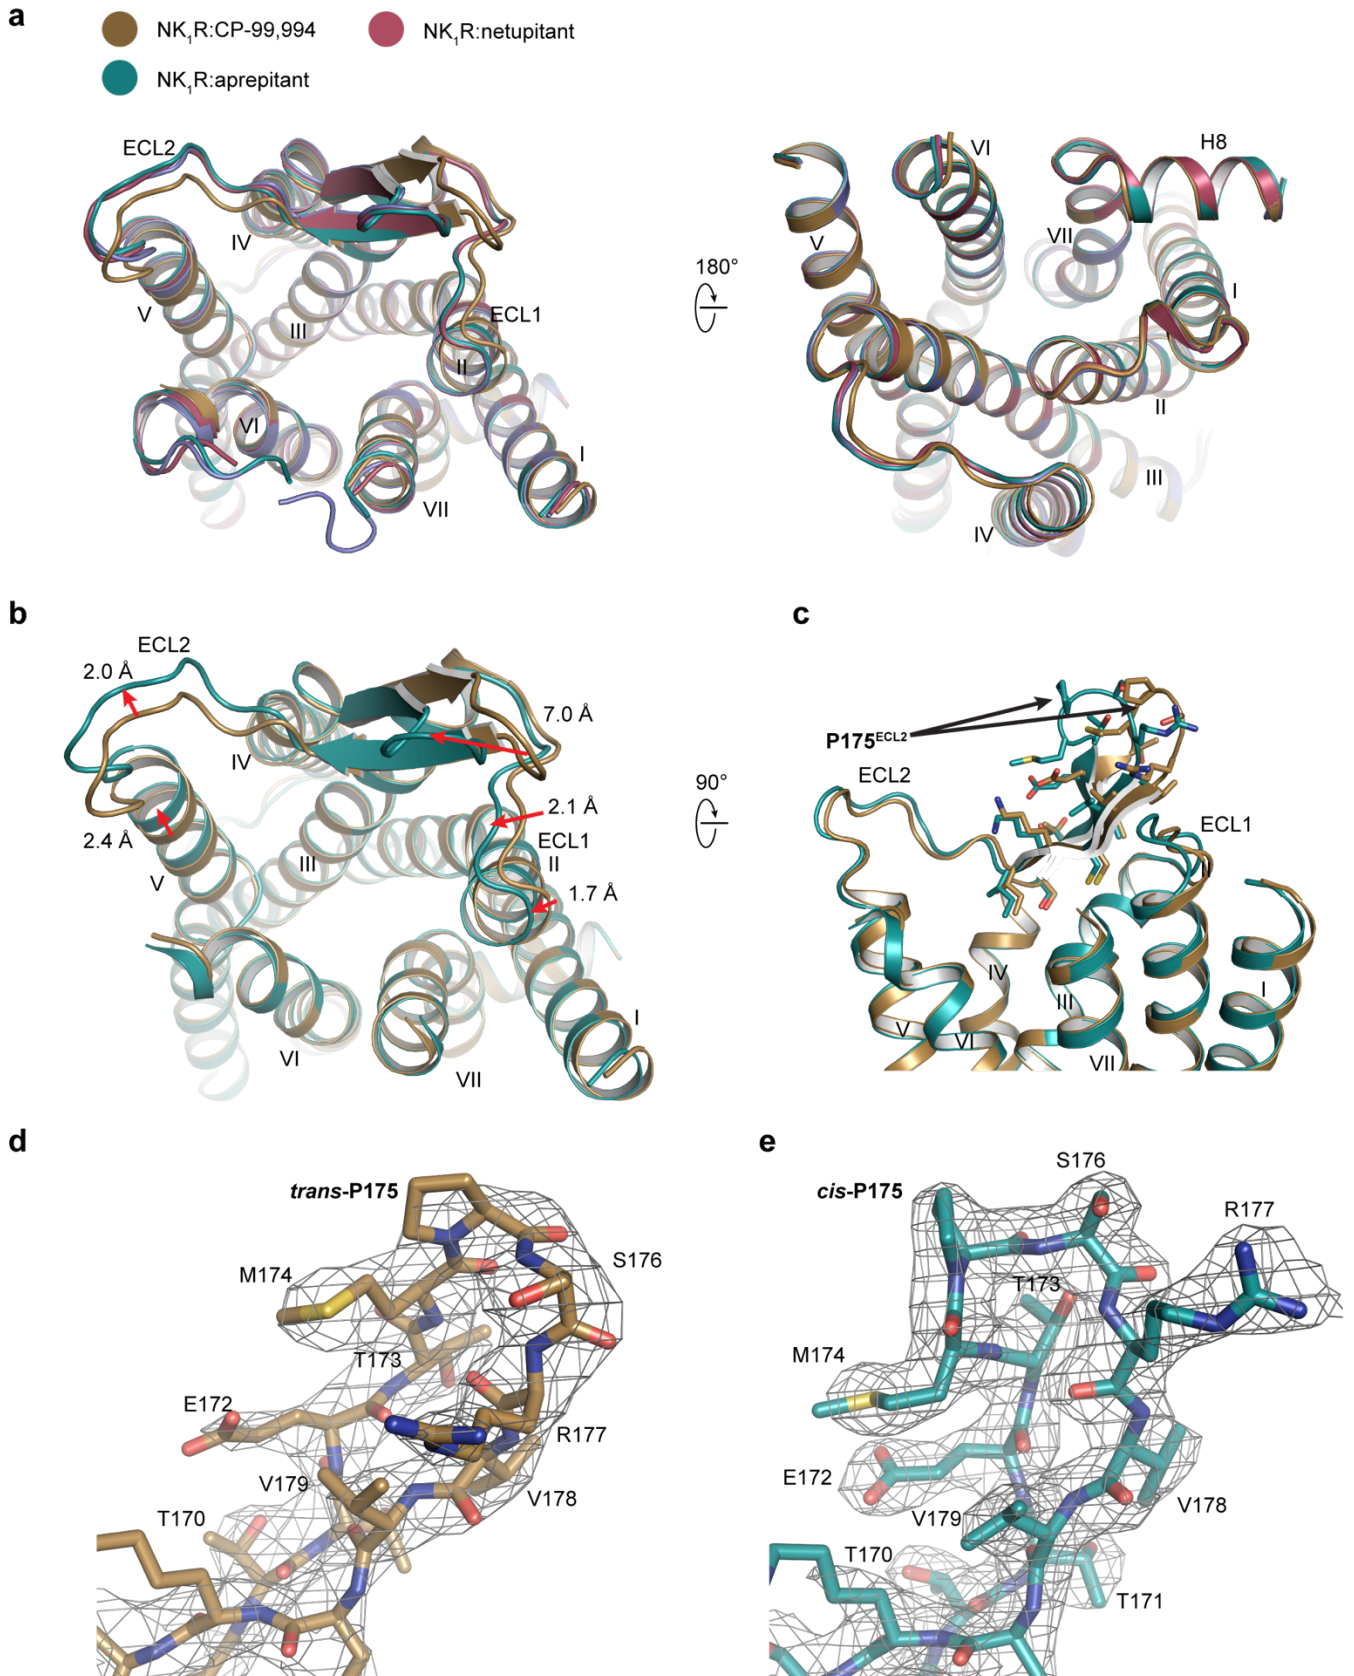

**Supplementary Figure 7. Conformational differences between the structures of NK<sub>1</sub>R in complex with different antagonists.** (a) Superimposition of NK<sub>1</sub>R in complex with CP-99,994, aprepitant and netupitant as viewed from the extracellular space and the cytoplasm. Receptors are coloured as in **Figure 1**. (b) Superimposition of the CP-99,994- and aprepitant-bound NK<sub>1</sub>R as viewed from the extracellular space. Differences in receptor conformation are indicated by arrows. (c) Side-view on CP-

99,994- and aprepitant-bound NK<sub>1</sub>R. Residues of the  $\beta$ -sheet and the  $\beta$ -hairpin of ECL2 are shown as sticks. The position of P175 in the  $\beta$ -hairpin of ECL2, which displays a different geometric isomerism in the two NK<sub>1</sub>R conformations, is indicated by an arrow. **(d)** Close-up view on the  $\beta$ -sheet and the  $\beta$ -hairpin of ECL2 of the CP-99,994-bound NK<sub>1</sub>R with the *trans*-P175 highlighted. **(e)** Close-up view on the  $\beta$ -sheet and the  $\beta$ -hairpin of ECL2 of the aprepitant-bound NK<sub>1</sub>R with the *cis*-P175 highlighted.

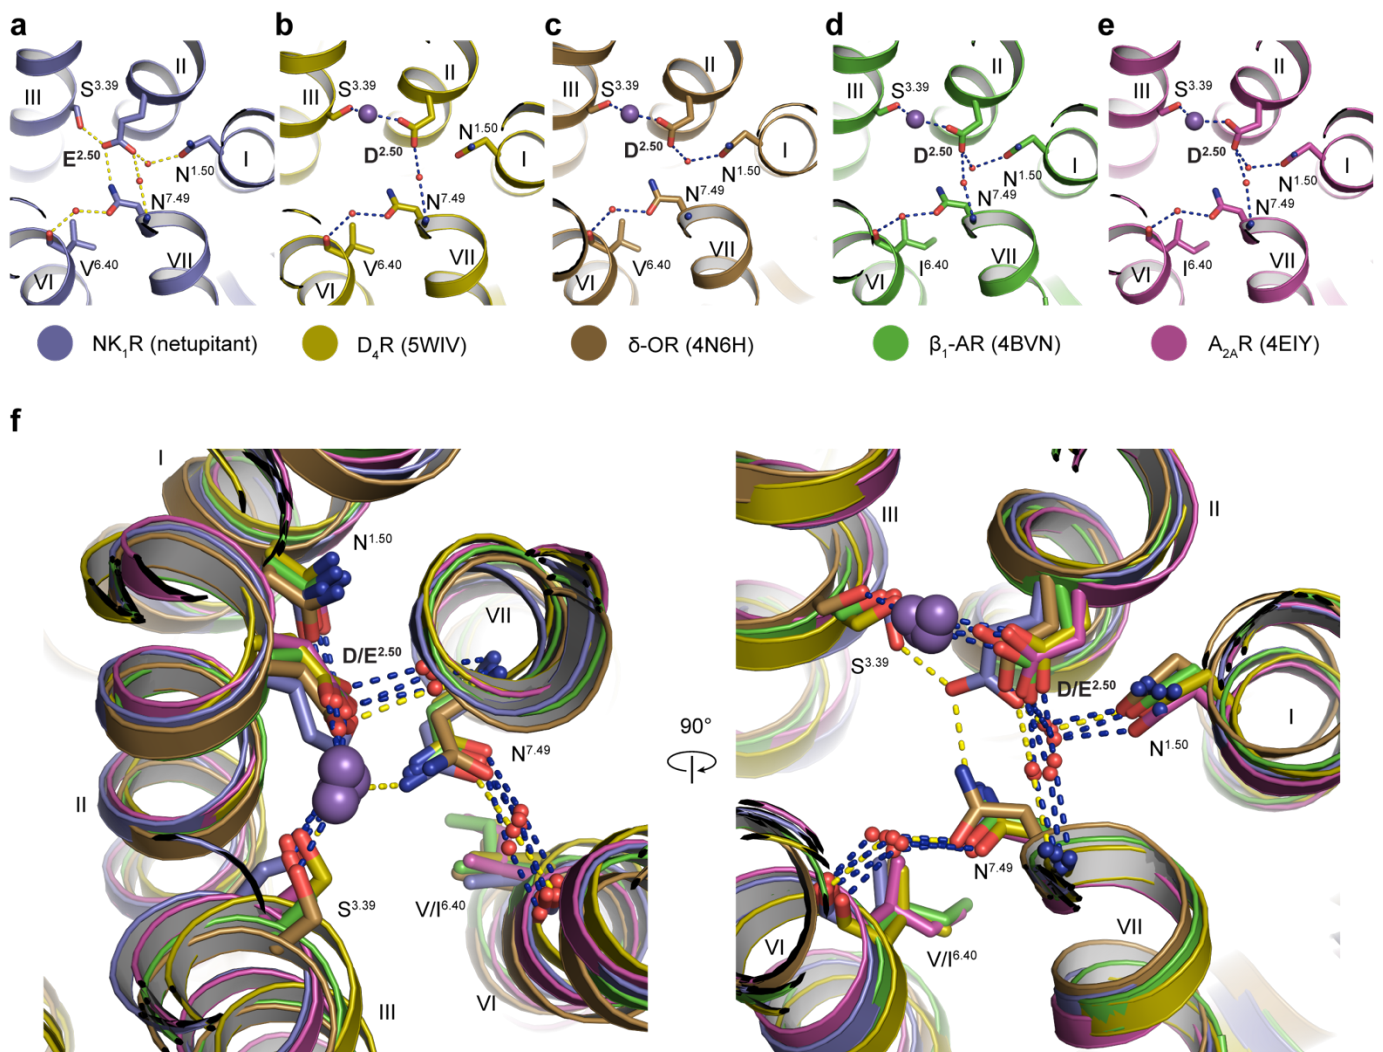

**Supplementary Figure 8. Hydrogen bonding network in the transmembrane core of high-resolution GPCR crystal structures.** (a-e) Extracellular view on the hydrogen bonding network in the transmembrane core of the netupitant-bound NK<sub>1</sub>R (a), the dopamine D<sub>4</sub> receptor (D<sub>4</sub>R, PDB ID 5WIV) (b), the δ-opioid receptor (δ-OR, PDB ID 4N6H) (c), the β<sub>1</sub>-adrenergic receptor (β<sub>1</sub>-AR, PDB ID 4BVN) (d) and the adenosine A<sub>2A</sub> receptor (A<sub>2A</sub>R, PDB ID 4EIY) (e). Ordered waters are shown as red spheres, sodium ions are shown as purple spheres and hydrogen bonds are indicated by a dashed line. (f) Overlay of the hydrogen bonding networks from the receptors in (a-e). Hydrogen bonds in NK<sub>1</sub>R are shown in yellow, hydrogen bonds in the other receptors are shown in blue.

**Supplementary Table 1 Binding of antagonists to wild-type and mutated NK<sub>1</sub>R variants.**

| construct                         | K <sub>i</sub> (nM) |            |            | surface expression<br>(% of WT) | n |
|-----------------------------------|---------------------|------------|------------|---------------------------------|---|
|                                   | CP-99,994           | aprepitant | netupitant |                                 |   |
| wt                                | 0.58±0.1            | 0.97±0.18  | 0.92±0.19  | 100                             | 5 |
| Q165A                             | 164.1±52.0          | 4.76±0.75  | 4.76±0.77  | 120±7                           | 5 |
| Q165E                             | 55.2±17.3           | 2.47±1.19  | 2.04±0.33  | 90±4                            | 5 |
| Q165D                             | <i>n.b.</i>         | 0.66±0.54  | 3.44±0.8   | 73±7                            | 3 |
| E193A                             | 1.86±0.40           | 0.69±0.18  | 0.76±0.19  | 91±4                            | 5 |
| E193K                             | 1.86±0.50           | 1.22±0.21  | 1.09±0.17  | 75±5                            | 5 |
| H197A                             | 2.01±0.33           | 1.56±0.4   | 9.17±2.46  | 90±3                            | 5 |
| H197F                             | 0.98±0.33           | 0.21±0.02  | 1.36±0.52  | 74±7                            | 5 |
| F264W                             | 10.6±1.7            | 2.92±0.51  | 3.87±0.33  | 107±6                           | 5 |
| NK <sub>1</sub> R-y04             | 2.79±0.36           | 0.74±0.31  | 0.86±0.11  | 46±7                            | 3 |
| NK <sub>1</sub> R <sub>XTAL</sub> | 4.21±0.43           | 10.1±0.6   | 14.9±0.2   | 86±7                            | 3 |

Whole-cell competition binding of SP-HL<sub>488</sub> to HEK293T cells expressing wild-type and mutated NK<sub>1</sub>R variants in the presence of different concentrations of unlabelled antagonists as a competitor. Data are shown as mean values ± SEM from 3-5 independent experiments performed in duplicate. *n.b.*, no binding.

**Supplementary Table 2 Primers used for construct generation**

| Primer                                                                                    | Sequence (5'-to-3')                                 |
|-------------------------------------------------------------------------------------------|-----------------------------------------------------|
| <b>NK<sub>1</sub>R crystallisation construct generation</b>                               |                                                     |
| NK1R-y04_L74A_for                                                                         | CTATTTTCTGGTGAACGCCGCTTCGCGGAGGCC                   |
| NK1R-y04_L74A_rev                                                                         | GCCTCCGCGAAGGCGGCGTTACCAGAAAATAGTTCGTC              |
| NK1R-y04_A144L_for                                                                        | GCCCCGGCTGTCACTGACAGCCACCAAAGTGGTC                  |
| NK1R-y04_A144L_rev                                                                        | CTTTGGTGGCTGTCACTGACAGCCGGGGCTGG                    |
| NK1R-y04_A215L_for                                                                        | GGTGATTGGCTATCTGTACACCGTAGTGGGAATCAC                |
| NK1R-y04_A215L_rev                                                                        | CCCCTACGGTGTACAGATAGCCAATCACCAGCAGG                 |
| NK1R-y04_K243A_for                                                                        | GAGCAAGTCTCTGCCGCCCCGCAAGGTGGTCAAAATGATG            |
| NK1R-y04_K243A_rev                                                                        | GACCACCTTGCGGGCGGCAGAGACTTGCTCGTG                   |
| NK1R-y04_226_PGS_rev                                                                      | GGACTCGTTCCAGAAGGAGCAGTCGATACCACTGGCCCCGTAGTGTGATTC |
| NK1R-y04_238_PGS_for                                                                      | AACTGCAAGAAACGCGCTATGTCTTCTCCGAGCAAGTCTCTGCCGCC     |
| NK1R-y04_1_pFL_for                                                                        | TTGGAGGTGCTGTTCCAGGGTCCCATGGATAACGTCCTCCCG          |
| NK1R-y04_335_pFL_rev                                                                      | TGTGGACACGGCGGTGACCAGCACTTATTATTCCAGCCCCCTCATAGTC   |
| <b>NK<sub>1</sub>R constructs generation for antagonist binding affinity measurements</b> |                                                     |
| NK1R_pcDNA3.1_for                                                                         | AGACTGGGCAAGCCTGGGCTGGGTGATATCGATAACGTCCTCCCGGTG    |
| NK1R_pcDNA3.1_rev                                                                         | ACTCGAGCGGCCGCCACTGTGCTGGATTTAGGAGAGCACATTGGAGGAG   |
| NK1R_165_MUT_rev                                                                          | GGGGAAGGCCAGCAGGAGAGCCAG                            |
| NK1R_Q165A_for                                                                            | CCTGGCTCTCCTGCTGGCCTTCCCCGCGGCTACTACTCAACCACAGAG    |
| NK1R_Q165E_for                                                                            | CCTGGCTCTCCTGCTGGCCTTCCCCGAGGGCTACTACTCAACCACAGAG   |
| NK1R_Q165D_for                                                                            | CCTGGCTCTCCTGCTGGCCTTCCCCGACGGCTACTACTCAACCACAGAG   |
| NK1R_193_MUT_rev                                                                          | ATAAATCTTGTTCCGGATGCTCTGGCCATTTCG                   |
| NK1R_E193A_for                                                                            | CCAGAGCATCCGAACAAGATTTATGCCAAAGTGTACCACATCTGTGTGAC  |
| NK1R_E193K_for                                                                            | CCAGAGCATCCGAACAAGATTTATAAGAAAGTGTACCACATCTGTGTGAC  |
| NK1R_197_MUT_rev                                                                          | GTACACTTTCTCATAAATCTTGTTCCGGATGCTCTG                |
| NK1R_H197A_for                                                                            | GAACAAGATTTATGAGAAAGTGTACGCCATCTGTGTGACTGTGCTGATC   |
| NK1R_H197F_for                                                                            | GAACAAGATTTATGAGAAAGTGTACTTCATCTGTGTGACTGTGCTGATC   |
| NK1R_264_MUT_rev                                                                          | GGGCAGCCAGCAGATGGCGAAGGTG                           |
| NK1R_F264W_for                                                                            | GCACCTTCGCCATCTGCTGGCTGCCCTGGCACATCTTCTTCCTCCTGCC   |
